# Supplementary material for: DNA Barcoding versus Morphological Variability of Pterostichus brevicornis brevicornis (Kirby, 1837) (Coleoptera, Carabidae) in the Arctic and Subarctic
Source: MDPI journal article supplement (doi:10.3390/insects13020204), 2022-02-16
Supplement: s1 [file s1]

Supplementary Materials:

# DNA Barcoding versus Morphological Variability of *Pterostichus brevicornis brevicornis* (Kirby, 1837) (Coleoptera, Carabidae) in the Arctic and Subarctic

Natalia Andreevna Zubrii, Boris Yurevich Filippov, Alexandr Vasilevich Kondakov,  
Olga Arturovna Khruleva, Leonid Borisovich Rybalov and Darya Vitalievna Vikhreva

**Table S1.** List of sequenced specimens of *Pterostichus b. brevicornis* and *Pterostichus nivalis*, including the location with BOLD and NCBI's GenBank accession numbers.

| Species                                                   | COI Haplotype Code | GenBank / BOLD IDS acc. no. (COI) | GenBank / BOLD IDS acc. no. (28S rRNA) | Locality                    | Data Source*      |
|-----------------------------------------------------------|--------------------|-----------------------------------|----------------------------------------|-----------------------------|-------------------|
| <i>Pterostichus brevicornis brevicornis</i> (Kirby, 1837) | Hapl1              | MN673460.1<br>ACHAR803-18         | n/a                                    | Canada, Nunavut             | Pentinsaari, 2020 |
| <i>P. b. brevicornis</i>                                  | Hapl1              | MN670020.1<br>ACHAR781-18         | n/a                                    | Canada, Nunavut             | Pentinsaari, 2020 |
| <i>P. b. brevicornis</i>                                  | Hapl1              | MN679965.1<br>ACHAR828-18         | n/a                                    | Canada, Nunavut             | Pentinsaari, 2020 |
| <i>P. b. brevicornis</i>                                  | Hapl1              | HQ961899.1<br>JSYKA240-10         | n/a                                    | Canada, Yukon, Firth River  | GenBank BOLD IDS  |
| <i>P. b. brevicornis</i>                                  | Hapl1              | HQ961900.1<br>JSYKA241-10         | n/a                                    | Canada, Yukon, Firth River  | GenBank BOLD IDS  |
| <i>P. b. brevicornis</i>                                  | Hapl1              | MN672408.1<br>ACHAR877-18         | n/a                                    | Canada, Nunavut             | Pentinsaari, 2020 |
| <i>P. b. brevicornis</i>                                  | Hapl6              | ACHAR876-18                       | n/a                                    | Canada, Nunavut             | BOLD IDS          |
| <i>P. b. brevicornis</i>                                  | Hapl6              | MN670684.1<br>ACHAR868-18         | n/a                                    | Canada, Nunavut             | Pentinsaari, 2020 |
| <i>P. b. brevicornis</i>                                  | Hapl8              | FCHAR1280                         | n/a                                    | Canada, Nunavut             | GenBank           |
| <i>P. b. brevicornis</i>                                  | Hapl8              | FCHAR2131                         | n/a                                    | Canada, Nunavut             | BOLD IDS          |
| <i>P. b. brevicornis</i>                                  | Hapl8              | FCHAR6620                         | n/a                                    | Canada, Nunavut             | GenBank           |
| <i>P. b. brevicornis</i>                                  | Hapl8              | FCHAR7057                         | n/a                                    | Canada, Nunavut             | BOLD IDS          |
| <i>P. b. brevicornis</i>                                  | Hapl8              | FCHAR7369                         | n/a                                    | Canada, Nunavut             | GenBank           |
| <i>P. b. brevicornis</i>                                  | Hapl13             | FCHAR7721                         | n/a                                    | Canada, Nunavut             | BOLD IDS          |
| <i>P. b. brevicornis</i>                                  | Hapl8              | FCHAR1303                         | n/a                                    | Canada, Nunavut             | GenBank           |
| <i>P. b. brevicornis</i>                                  | Hapl8              | FCHAR1618                         | n/a                                    | Canada, Nunavut             | BOLD IDS          |
| <i>P. b. brevicornis</i>                                  | Hapl8              | FCHAR2132                         | n/a                                    | Canada, Nunavut             | GenBank           |
| <i>P. b. brevicornis</i>                                  | Hapl8              | FCHAR5467                         | n/a                                    | Canada, Nunavut             | BOLD IDS          |
| <i>P. b. brevicornis</i>                                  | Hapl2              | JSYKA235-10                       | n/a                                    | Canada, Yukon, Firth River  | GenBank BOLD IDS  |
| <i>P. b. brevicornis</i>                                  | Hapl6              | HQ961895.1<br>JSYKA236-10         | n/a                                    | Canada, Yukon, Firth River  | GenBank BOLD IDS  |
| <i>P. b. brevicornis</i>                                  | Hapl7              | HQ961896.1<br>JSYKA237-10         | n/a                                    | Canada, Yukon, Firth River  | GenBank BOLD IDS  |
| <i>P. b. brevicornis</i>                                  | Hapl8              | HQ961897.1<br>JSYKA238-10         | n/a                                    | Canada, Yukon, Firth River  | GenBank BOLD IDS  |
| <i>P. b. brevicornis</i>                                  | Hapl8              | HQ961898.1<br>JSYKA239-10         | n/a                                    | Canada, Yukon, Firth River  | GenBank BOLD IDS  |
| <i>P. b. brevicornis</i>                                  | Hapl4              | KJ204113.1<br>HMCOC006-07         | n/a                                    | Canada, Manitoba, Churchill | Woodcock, 2013    |



|                          |       |                           |     |                                     |                     |
|--------------------------|-------|---------------------------|-----|-------------------------------------|---------------------|
| <i>P. b. brevicornis</i> | Hapl4 | KJ203181.1<br>HMCOC510-09 | n/a | Canada, Manitoba, Churchill         | Woodcock,<br>2013   |
| <i>P. b. brevicornis</i> | Hapl4 | KJ203639.1<br>HMCOC627-09 | n/a | Canada, Manitoba, Churchill         | Woodcock,<br>2013   |
| <i>P. b. brevicornis</i> | Hapl4 | KJ203239.1<br>MZCHU103-07 | n/a | Canada, Manitoba, Churchill         | Woodcock,<br>2013   |
| <i>P. b. brevicornis</i> | Hapl4 | KJ203875.1<br>MZCHU107-07 | n/a | Canada, Manitoba, Churchill         | Woodcock,<br>2013   |
| <i>P. b. brevicornis</i> | Hapl4 | KJ204094.1<br>MZCHU111-07 | n/a | Canada, Manitoba, Churchill         | Woodcock,<br>2013   |
| <i>P. b. brevicornis</i> | Hapl4 | JN310764.1<br>TWCOL664-10 | n/a | Canada, Manitoba, Churchill         | GenBank<br>BOLD IDS |
| <i>P. b. brevicornis</i> | Hapl4 | KJ203437.1<br>DSCOL501-07 | n/a | Canada, Manitoba, Churchill         | Woodcock,<br>2013   |
| <i>P. b. brevicornis</i> | Hapl4 | KJ203343.1<br>HMCOC242-07 | n/a | Canada, Manitoba, Churchill         | Woodcock,<br>2013   |
| <i>P. b. brevicornis</i> | Hapl4 | KJ204090.1<br>HMCOC259-07 | n/a | Canada, Manitoba, Churchill         | Woodcock,<br>2013   |
| <i>P. b. brevicornis</i> | Hapl4 | KJ203213.1<br>HMCOC631-09 | n/a | Canada, Manitoba, Churchill         | Woodcock,<br>2013   |
| <i>P. b. brevicornis</i> | Hapl4 | KJ203822.1<br>HMCOC632-09 | n/a | Canada, Manitoba, Churchill         | Woodcock,<br>2013   |
| <i>P. b. brevicornis</i> | Hapl4 | KJ204238.1<br>HMCOC629-09 | n/a | Canada, Manitoba, Churchill         | GenBank<br>BOLD IDS |
| <i>P. b. brevicornis</i> | Hapl4 | HQ582357.1<br>TWCOL385-10 | n/a | Canada, Manitoba                    | GenBank<br>BOLD IDS |
| <i>P. b. brevicornis</i> | Hapl5 | KJ203657.1<br>HMCOL237-09 | n/a | Canada, Manitoba, Churchill         | Woodcock,<br>2013   |
| <i>P. b. brevicornis</i> | Hapl9 | KU876036.1<br>UAMIC364-13 | n/a | USA, Alaska, Talkeetna              | Sikes, 2017         |
| <i>P. b. brevicornis</i> | Hapl2 | BETN4365-19               | n/a | USA, Alaska, Fairbanks Bor-<br>ough | BOLD IDS            |
| <i>P. b. brevicornis</i> | Hapl2 | BETN4479-19               | n/a | USA, Alaska, Fairbanks Bor-<br>ough | BOLD IDS            |
| <i>P. b. brevicornis</i> | Hapl2 | BETN4485-19               | n/a | USA, Alaska, Fairbanks Bor-<br>ough | BOLD IDS            |
| <i>P. b. brevicornis</i> | Hapl2 | BETN4487-19               | n/a | USA, Alaska, Fairbanks Bor-<br>ough | BOLD IDS            |
| <i>P. b. brevicornis</i> | Hapl2 | BETN4497-19               | n/a | USA, Alaska, Fairbanks Bor-<br>ough | BOLD IDS            |
| <i>P. b. brevicornis</i> | Hapl2 | BETN4506-19               | n/a | USA, Alaska, Fairbanks Bor-<br>ough | BOLD IDS            |
| <i>P. b. brevicornis</i> | Hapl2 | BETN647-18                | n/a | USA, Alaska, Fairbanks Bor-<br>ough | BOLD IDS            |
| <i>P. b. brevicornis</i> | Hapl2 | BETN4477-19               | n/a | USA, Alaska, Fairbanks Bor-<br>ough | BOLD IDS            |
| <i>P. b. brevicornis</i> | Hapl2 | BETN4488-19               | n/a | USA, Alaska, Fairbanks Bor-<br>ough | BOLD IDS            |
| <i>P. b. brevicornis</i> | Hapl2 | BETN4361-19               | n/a | USA, Alaska, Fairbanks Bor-<br>ough | BOLD IDS            |
| <i>P. b. brevicornis</i> | Hapl2 | BETN4480-19               | n/a | USA, Alaska, Fairbanks Bor-<br>ough | BOLD IDS            |
| <i>P. b. brevicornis</i> | Hapl2 | BETN4483-19               | n/a | USA, Alaska, Fairbanks Bor-<br>ough | BOLD IDS            |
| <i>P. b. brevicornis</i> | Hapl2 | BETN4484-19               | n/a | USA, Alaska, Fairbanks Bor-<br>ough | BOLD IDS            |
| <i>P. b. brevicornis</i> | Hapl2 | BETN4500-19               | n/a | USA, Alaska, Fairbanks Bor-<br>ough | BOLD IDS            |



|                          |        |             |     |                                  |          |
|--------------------------|--------|-------------|-----|----------------------------------|----------|
| <i>P. b. brevicornis</i> | Hapl2  | BETN646-18  | n/a | USA, Alaska, Fairbanks Borough   | BOLD IDS |
| <i>P. b. brevicornis</i> | Hapl2  | BETN7632-20 | n/a | USA, Alaska, Fairbanks Borough   | BOLD IDS |
| <i>P. b. brevicornis</i> | Hapl3  | BETN4478-19 | n/a | USA, Alaska, Fairbanks Borough   | BOLD IDS |
| <i>P. b. brevicornis</i> | Hapl3  | BETN4493-19 | n/a | USA, Alaska, Fairbanks Borough   | BOLD IDS |
| <i>P. b. brevicornis</i> | Hapl3  | BETN4333-19 | n/a | USA, Alaska, Fairbanks Borough   | BOLD IDS |
| <i>P. b. brevicornis</i> | Hapl3  | BETN4372-19 | n/a | USA, Alaska, Fairbanks Borough   | BOLD IDS |
| <i>P. b. brevicornis</i> | Hapl3  | BETN4489-19 | n/a | USA, Alaska, Fairbanks Borough   | BOLD IDS |
| <i>P. b. brevicornis</i> | Hapl3  | BETN4490-19 | n/a | USA, Alaska, Fairbanks Borough   | BOLD IDS |
| <i>P. b. brevicornis</i> | Hapl3  | BETN4319-19 | n/a | USA, Alaska, Fairbanks Borough   | BOLD IDS |
| <i>P. b. brevicornis</i> | Hapl3  | BETN4495-19 | n/a | USA, Alaska, Fairbanks Borough   | BOLD IDS |
| <i>P. b. brevicornis</i> | Hapl3  | BETN4496-19 | n/a | USA, Alaska, Fairbanks Borough   | BOLD IDS |
| <i>P. b. brevicornis</i> | Hapl3  | BETN4318-19 | n/a | USA, Alaska, Fairbanks Borough   | BOLD IDS |
| <i>P. b. brevicornis</i> | Hapl3  | BETN4321-19 | n/a | USA, Alaska, Fairbanks Borough   | BOLD IDS |
| <i>P. b. brevicornis</i> | Hapl3  | BETN4327-19 | n/a | USA, Alaska, Fairbanks Borough   | BOLD IDS |
| <i>P. b. brevicornis</i> | Hapl3  | BETN4481-19 | n/a | USA, Alaska, Fairbanks Borough   | BOLD IDS |
| <i>P. b. brevicornis</i> | Hapl14 | BETN7631-20 | n/a | USA, Alaska, Fairbanks Borough   | BOLD IDS |
| <i>P. b. brevicornis</i> | Hapl15 | BETN7637-20 | n/a | USA, Alaska, Fairbanks Borough   | BOLD IDS |
| <i>P. b. brevicornis</i> | Hapl12 | BETN7640-20 | n/a | USA, Alaska, Fairbanks Borough   | BOLD IDS |
| <i>P. b. brevicornis</i> | Hapl3  | BETN7627-20 | n/a | USA, Alaska, Southeast Fairbanks | BOLD IDS |
| <i>P. b. brevicornis</i> | Hapl2  | BETN7619-20 | n/a | USA, Alaska, Southeast Fairbanks | BOLD IDS |
| <i>P. b. brevicornis</i> | Hapl2  | BETN4409-19 | n/a | USA, Alaska, Denali Borough      | BOLD IDS |
| <i>P. b. brevicornis</i> | Hapl2  | BETN4428-19 | n/a | USA, Alaska, Denali Borough      | BOLD IDS |
| <i>P. b. brevicornis</i> | Hapl2  | BETN4455-19 | n/a | USA, Alaska, Denali Borough      | BOLD IDS |
| <i>P. b. brevicornis</i> | Hapl2  | BETN4429-19 | n/a | USA, Alaska, Denali Borough      | BOLD IDS |
| <i>P. b. brevicornis</i> | Hapl2  | BETN4431-19 | n/a | USA, Alaska, Denali Borough      | BOLD IDS |
| <i>P. b. brevicornis</i> | Hapl2  | BETN4470-19 | n/a | USA, Alaska, Denali Borough      | BOLD IDS |
| <i>P. b. brevicornis</i> | Hapl2  | BETN609-18  | n/a | USA, Alaska, Denali Borough      | BOLD IDS |
| <i>P. b. brevicornis</i> | Hapl2  | BETN4458-19 | n/a | USA, Alaska, Denali Borough      | BOLD IDS |
| <i>P. b. brevicornis</i> | Hapl2  | BETN568-18  | n/a | USA, Alaska, Denali Borough      | BOLD IDS |
| <i>P. b. brevicornis</i> | Hapl2  | BETN612-18  | n/a | USA, Alaska, Denali Borough      | BOLD IDS |
| <i>P. b. brevicornis</i> | Hapl2  | BETN4420-19 | n/a | USA, Alaska, Denali Borough      | BOLD IDS |
| <i>P. b. brevicornis</i> | Hapl2  | BETN579-18  | n/a | USA, Alaska, Denali Borough      | BOLD IDS |
| <i>P. b. brevicornis</i> | Hapl2  | BETN636-18  | n/a | USA, Alaska, Denali Borough      | BOLD IDS |
| <i>P. b. brevicornis</i> | Hapl3  | BETN4433-19 | n/a | USA, Alaska, Denali Borough      | BOLD IDS |
| <i>P. b. brevicornis</i> | Hapl11 | BETN623-18  | n/a | USA, Alaska, Denali Borough      | BOLD IDS |
| <i>P. b. brevicornis</i> | Hapl12 | BETN633-18  | n/a | USA, Alaska, Denali Borough      | BOLD IDS |
| <i>P. b. brevicornis</i> | Hapl10 | BETN4423-19 | n/a | USA, Alaska, Denali Borough      | BOLD IDS |
| <i>P. b. brevicornis</i> | Hapl10 | BETN4254-19 | n/a | USA, Alaska, Toolik              | BOLD IDS |



|                          |        |             |          |                                               |               |
|--------------------------|--------|-------------|----------|-----------------------------------------------|---------------|
| <i>P. b. brevicornis</i> | Hapl10 | BETN4261-19 | n/a      | USA, Alaska, Toolik                           | BOLD IDS      |
| <i>P. b. brevicornis</i> | Hapl1  | BETN4256-19 | n/a      | USA, Alaska, Toolik                           | BOLD IDS      |
| <i>P. b. brevicornis</i> | Hapl10 | MT792007    | MZ366473 | Russia, Chukotka, Pevek                       | Present study |
| <i>P. b. brevicornis</i> | Hapl18 | MT792008    | n/a      | Russia, Chukotka, Pevek                       | Present study |
| <i>P. b. brevicornis</i> | Hapl18 | MT792009    | MZ366474 | Russia, Chukotka, Pevek                       | Present study |
| <i>P. b. brevicornis</i> | Hapl10 | MT792010    | MT791964 | Russia, Chukotka, Apapelgino                  | Present study |
| <i>P. b. brevicornis</i> | Hapl10 | MT792011    | n/a      | Russia, Chukotka, Apapelgino                  | Present study |
| <i>P. b. brevicornis</i> | Hapl10 | MT792012    | n/a      | Russia, Chukotka, Alkatvaam                   | Present study |
| <i>P. b. brevicornis</i> | Hapl10 | MT792013    | n/a      | Russia, Chukotka, Alkatvaam                   | Present study |
| <i>P. b. brevicornis</i> | Hapl10 | MT792014    | n/a      | Russia, Chukotka, Alkatvaam                   | Present study |
| <i>P. b. brevicornis</i> | Hapl21 | MT792015    | n/a      | Russia, Chukotka, Alkatvaam                   | Present study |
| <i>P. b. brevicornis</i> | Hapl10 | MT792016    | n/a      | Russia, Chukotka, Alkatvaam                   | Present study |
| <i>P. b. brevicornis</i> | Hapl10 | MT792017    | MT791965 | Russia, Chukotka, Hatyrka                     | Present study |
| <i>P. b. brevicornis</i> | Hapl10 | MT792018    | MT791966 | Russia, Chukotka, Hatyrka                     | Present study |
| <i>P. b. brevicornis</i> | Hapl10 | MT792019    | n/a      | Russia, Chukotka, Hatyrka                     | Present study |
| <i>P. b. brevicornis</i> | Hapl10 | MT792020    | n/a      | Russia, Chukotka, Hatyrka                     | Present study |
| <i>P. b. brevicornis</i> | Hapl10 | MT792021    | MT791967 | Russia, Chukotka, Amguema                     | Present study |
| <i>P. b. brevicornis</i> | Hapl10 | MT792022    | MT791968 | Russia, Chukotka, Amguema                     | Present study |
| <i>P. b. brevicornis</i> | Hapl10 | MT792023    | MT791969 | Russia, Chukotka, Meynipilgino                | Present study |
| <i>P. b. brevicornis</i> | Hapl10 | MZ351277    | n/a      | Russia, Chukotka, Kosa Belyaka                | Present study |
| <i>P. b. brevicornis</i> | Hapl10 | MZ351278    | n/a      | Russia, Chukotka, Kosa Belyaka                | Present study |
| <i>P. b. brevicornis</i> | Hapl10 | MT792024    | MT791970 | Russia, Wrangel Island, Somnitelnaya Bay      | Present study |
| <i>P. b. brevicornis</i> | Hapl20 | MT792025    | MT791971 | Russia, Wrangel Island, Somnitelnie mountains | Present study |
| <i>P. b. brevicornis</i> | Hapl20 | MZ351285    | n/a      | Russia, Wrangel Island, Somnitelnie mountain  | Present study |
| <i>P. b. brevicornis</i> | Hapl6  | MZ351282    | n/a      | Russia, Wrangel Island, Somnitelnie mountains | Present study |
| <i>P. b. brevicornis</i> | Hapl10 | MT792026    | MT791972 | Russia, Wrangel Island, Mineevea mountains    | Present study |
| <i>P. b. brevicornis</i> | Hapl10 | MT792027    | n/a      | Russia, Wrangel Island, Mineevea mountains    | Present study |
| <i>P. b. brevicornis</i> | Hapl18 | MT792028    | MT791973 | Russia, Taymyr area, Kotuy                    | Present study |
| <i>P. b. brevicornis</i> | Hapl18 | MT792029    | MT791974 | Russia, Taymyr area, Kotuy                    | Present study |
| <i>P. b. brevicornis</i> | Hapl10 | MT792030    | n/a      | Russia, Taymyr Peninsula, Ary-Mas             | Present study |
| <i>P. b. brevicornis</i> | Hapl10 | MT792031    | MT791975 | Russia, Taymyr Peninsula, Ary-Mas             | Present study |
| <i>P. b. brevicornis</i> | Hapl18 | MT792032    | n/a      | Russia, Taymyr Peninsula, Ary-Mas             | Present study |
| <i>P. b. brevicornis</i> | Hapl18 | MT792033    | n/a      | Russia, Taymyr Peninsula, Ary-Mas             | Present study |
| <i>P. b. brevicornis</i> | Hapl18 | MT792034    | n/a      | Russia, Taymyr Peninsula, Ary-Mas             | Present study |
| <i>P. b. brevicornis</i> | Hapl18 | MT792035    | n/a      | Russia, Taymyr area, Kotuy                    | Present study |
| <i>P. b. brevicornis</i> | Hapl18 | MT792036    | n/a      | Russia, Taymyr Peninsula, Kotuy               | Present study |
| <i>P. b. brevicornis</i> | Hapl18 | MT792037    | n/a      | Russia, Taymyr Peninsula, Kotuy               | Present study |
| <i>P. b. brevicornis</i> | Hapl15 | MT792038    | MT791976 | Russia, Polar Ural, Harp                      | Present study |
| <i>P. b. brevicornis</i> | Hapl15 | MT792039    | MT791977 | Russia, Polar Ural, Harp                      | Present study |
| <i>P. b. brevicornis</i> | Hapl15 | MT792040    | MT791978 | Russia, Polar Ural, Harp                      | Present study |
| <i>P. b. brevicornis</i> | Hapl15 | MT792041    | MZ366462 | Russia, Polar Ural, Harp                      | Present study |
| <i>P. b. brevicornis</i> | Hapl15 | MT792042    | n/a      | Russia, Polar Ural, Harp                      | Present study |



|                          |        |          |          |                                       |               |
|--------------------------|--------|----------|----------|---------------------------------------|---------------|
| <i>P. b. brevicornis</i> | Hapl15 | MT792043 | n/a      | Russia, Tazovsky Peninsula, Messoyaha | Present study |
| <i>P. b. brevicornis</i> | Hapl15 | MT792044 | MT791979 | Russia, Tazovsky Peninsula, Messoyaha | Present study |
| <i>P. b. brevicornis</i> | Hapl15 | MT792045 | MT791980 | Russia, Tazovsky Peninsula, Messoyaha | Present study |
| <i>P. b. brevicornis</i> | Hapl18 | MT792046 | n/a      | Russia, Tazovsky Peninsula, Messoyaha | Present study |
| <i>P. b. brevicornis</i> | Hapl16 | MT792047 | MT791981 | Russia, Vaigach Island, Bolvansky Nos | Present study |
| <i>P. b. brevicornis</i> | Hapl16 | MT792048 | MT791982 | Russia, Vaigach Island, Bolvansky Nos | Present study |
| <i>P. b. brevicornis</i> | Hapl16 | MZ351267 | n/a      | Russia, Vaigach Island, Bolvansky Nos | Present study |
| <i>P. b. brevicornis</i> | Hapl17 | MZ351259 | n/a      | Russia, Vaigach Island, Bolvansky Nos | Present study |
| <i>P. b. brevicornis</i> | Hapl17 | MZ351260 | MZ366463 | Russia, Vaigach Island, Bolvansky Nos | Present study |
| <i>P. b. brevicornis</i> | Hapl17 | MZ351261 | MZ366464 | Russia, Vaigach Island, Bolvansky Nos | Present study |
| <i>P. b. brevicornis</i> | Hapl17 | MZ351262 | n/a      | Russia, Vaigach Island, Bolvansky Nos | Present study |
| <i>P. b. brevicornis</i> | Hapl17 | MZ351263 | n/a      | Russia, Vaigach Island, Bolvansky Nos | Present study |
| <i>P. b. brevicornis</i> | Hapl17 | MZ351264 | n/a      | Russia, Vaigach Island, Bolvansky Nos | Present study |
| <i>P. b. brevicornis</i> | Hapl17 | MZ351265 | n/a      | Russia, Vaigach Island, Bolvansky Nos | Present study |
| <i>P. b. brevicornis</i> | Hapl17 | MZ351266 | n/a      | Russia, Vaigach Island, Bolvansky Nos | Present study |
| <i>P. b. brevicornis</i> | Hapl17 | MZ351267 | n/a      | Russia, Vaigach Island, Bolvansky Nos | Present study |
| <i>P. b. brevicornis</i> | Hapl19 | MT792049 | MZ366465 | Russia, Ygorsky Peninsula, Amderma    | Present study |
| <i>P. b. brevicornis</i> | Hapl16 | MT792050 | MZ366466 | Russia, Ygorsky Peninsula, Amderma    | Present study |
| <i>P. b. brevicornis</i> | Hapl10 | MT792051 | n/a      | Russia, Ygorsky Peninsula, Amderma    | Present study |
| <i>P. b. brevicornis</i> | Hapl16 | MT792052 | MT791983 | Russia, Ygorsky Peninsula, Amderma    | Present study |
| <i>P. b. brevicornis</i> | Hapl16 | MZ351269 | MZ366467 | Russia, Ygorsky Peninsula, Amderma    | Present study |
| <i>P. b. brevicornis</i> | Hapl16 | MZ351270 | MZ366468 | Russia, Ygorsky Peninsula, Beliy Nos  | Present study |
| <i>P. b. brevicornis</i> | Hapl16 | MT792053 | n/a      | Russia, Pinega reserve                | Present study |
| <i>P. b. brevicornis</i> | Hapl16 | MT792054 | MT791984 | Russia, Pinega reserve                | Present study |
| <i>P. b. brevicornis</i> | Hapl16 | MT792055 | MT791985 | Russia, Pinega reserve                | Present study |
| <i>P. b. brevicornis</i> | Hapl22 | MT792056 | MT791986 | Russia, Kanin Peninsula, Shoina       | Present study |
| <i>P. b. brevicornis</i> | Hapl17 | MT792057 | MT791987 | Russia, Kanin Peninsula, Shoina       | Present study |
| <i>P. b. brevicornis</i> | Hapl22 | MT792058 | n/a      | Russia, Kanin Peninsula, Shoina       | Present study |
| <i>P. b. brevicornis</i> | Hapl22 | MT792059 | n/a      | Russia, Kanin Peninsula, Shoina       | Present study |
| <i>P. b. brevicornis</i> | Hapl22 | MT792060 | n/a      | Russia, Kanin Peninsula, Shoina       | Present study |



|                                                  |        |          |          |                                   |               |
|--------------------------------------------------|--------|----------|----------|-----------------------------------|---------------|
| <i>P. b. brevicornis</i>                         | Hapl17 | MT792061 | n/a      | Russia, Kanin Peninsula, Shoina   | Present study |
| <i>P. b. brevicornis</i>                         | Hapl17 | MT792062 | n/a      | Russia, Kanin Peninsula, Shoina   | Present study |
| <i>P. b. brevicornis</i>                         | Hapl17 | MT792063 | n/a      | Russia, Kanin Peninsula, Shoina   | Present study |
| <i>P. b. brevicornis</i>                         | Hapl17 | MT792064 | n/a      | Russia, Kanin Peninsula, Shoina   | Present study |
| <i>P. b. brevicornis</i>                         | Hapl19 | MT792065 | n/a      | Russia, Yamal Peninsula, Sey-akha | Present study |
| <i>P. b. brevicornis</i>                         | Hapl23 | MT792066 | n/a      | Kamchatka, Karaginskiy Island     | Present study |
| <i>P. b. brevicornis</i>                         | Hapl23 | MZ351281 | n/a      | Kamchatka, Karaginskiy Island     | Present study |
| <i>Out-group taxa</i>                            |        |          |          |                                   |               |
| <i>Pterostichus nivalis</i> (R.F.Sahlberg, 1844) | -      | MT792067 | MT791988 | Russia, Chukotka, Apapelgino      | Present study |
| <i>P. nivalis</i>                                | -      | MT792068 | MT791989 | Russia, Chukotka, Hatyrka         | Present study |
| <i>P. nivalis</i>                                | -      | MT792069 | MT791990 | Russia, Chukotka, Kosa Belyaka    | Present study |

**Table S2.** *Pterostichus brevicornis brevicornis* 28S rRNA polymorphism \*.

| Haplotype, Code | GenBank acc. no.                                                                                                                | 173 | 274 | 276 | 404 | 423 | 428 | 429 | 430 | 447 | 488 |
|-----------------|---------------------------------------------------------------------------------------------------------------------------------|-----|-----|-----|-----|-----|-----|-----|-----|-----|-----|
| Hapl 1          | MT791970, MT791967, MT791968, MT791969                                                                                          | T   | C   | T   | G   | T   | G   | A   | A   | C   | -   |
| Hapl 2          | MT791965, MT791966                                                                                                              | .   | .   | .   | .   | C   | .   | .   | .   | .   | -   |
| Hapl 3          | MT791971, MT791972, MZ366473                                                                                                    | .   | .   | .   | .   | .   | T   | T   | -   | T   | T   |
| Hapl 4          | MT791973, MT791976, MT791977, MT791978, MZ366462, MT791981, MT791979, MT791980, MZ366465, MZ366466, MZ366467 MT791983, MZ366468 | A   | T   | -   | .   | .   | T   | T   | -   | T   | -   |
| Hapl 5          | MT791964                                                                                                                        | A   | T   | -   | .   | .   | T   | T   | T   | .   | T   |
| Hapl 6          | MT791974, MT791975                                                                                                              | A   | T   | -   | A   | .   | T   | T   | -   | T   | -   |
| Hapl 7          | MT791982, MZ366463, MZ366464, MT791984 MT791985, MT791986, MT791987                                                             | A   | T   | -   | .   | .   | T   | T   | -   | .   | -   |
| Hapl 8          | MZ366474                                                                                                                        | A   | T   | -   | .   | .   | T   | T   | T   | .   | -   |

\* - Numbers in the top row refer to nucleotide positions within a condensed alignment of the sequences, letters are FASTA codes for nucleotides but with additional polymorphisms shown explicitly. Dots indicate a nucleotide matching the first sequence. Dashes indicate gaps after alignment of the sequences.



**Table S3.** Sampling sites and sample size: total number of pronotum (males and females) and male genitalia (aedeagus) of *Pterostichus b. brevicornis*.

| Locality           | Site                       | Sampling year | Sample size |           | Aedeagus  | Sequences     |
|--------------------|----------------------------|---------------|-------------|-----------|-----------|---------------|
|                    |                            |               | Pronotum    |           |           |               |
|                    |                            |               | male        | female    |           |               |
| Ygorsky Peninsula  | Amderma settlement (Am)    | 2012          | 3           | 3         | 4         | COI, 28S rRNA |
| Kolguev Island     | Bugrino settlement (Bug)   | 2009          | 3           | 3         | 3         | n/a           |
| Kanin Peninsula    | Shoina settlement (Sho)    | 2019          | 5           | 4         | 4         | COI, 28S rRNA |
| Pinega reserve     | Golubino settlement (Pin)  | 2019          | 4           | 3         | 5         | COI, 28S rRNA |
| Vaygach Island     | Bolvansky Nos (Vay)        | 2013          | 8           | 3         | 8         | COI, 28S rRNA |
| Kola Peninsula     | Khibiny mountains (Khi)    | 2018          | 3           | 3         | -         | n/a           |
| Polar Ural         | Harp settlement (PU)       | 2017          | 6           | 3         | 6         | COI, 28S rRNA |
| Yamal Peninsula    | Syoyakha settlement (Yam)  | 2014          | 5           | 3         | 5         | COI           |
| Tazovsky Peninsula | Messoyaha River (Taz)      | 2008          | 4           | 3         | 4         | COI, 28S rRNA |
| Taymyr Peninsula   | Meduza Bay (MB)            | 2002          | -           | -         | 2         | n/a           |
| Taymyr area        | Kotuy River (T.Kr)         | 2010          | 3           | 3         | -         | COI, 28S rRNA |
| Taymyr Peninsula   | Maksimovka River (T.Mr)    | 2003          | 3           | 3         | -         | n/a           |
| Taymyr Peninsula   | Ladannah Lake (T.Lr)       | 2001          | 8           | 3         | 8         | n/a           |
| Taymyr Peninsula   | Ary-Mas (AM)               | 2010          | 3           | 3         | -         | COI, 28S rRNA |
| Chukotka           | Pevek settlement (Pev)     | 2011          | 3           | 3         | -         | COI           |
| Chukotka           | Apapelgino settlement (Ap) | 2019          | 3           | 3         | -         | COI, 28S rRNA |
| Wrangel Island     | Mineeva mountains (Wr)     | 2015          | 3           | 3         | -         | COI, 28S rRNA |
| <b>Total</b>       |                            |               | <b>67</b>   | <b>49</b> | <b>49</b> |               |

n/a – not available.

**Table S4.** Contribution of significant principal components to shape variation of pronotum and aedeagus of *Pterostichus b. brevicornis*.

| Components | Pronotum             |                |                | Aedeagus             |                |                |
|------------|----------------------|----------------|----------------|----------------------|----------------|----------------|
|            | Eigenvalue           | Proportion (%) | Cumulative (%) | Eigenvalue           | Proportion (%) | Cumulative (%) |
| PC1        | 10.1×10 <sup>5</sup> | 51.10          | 51.10          | 41.0×10 <sup>5</sup> | 55.45          | 55.45          |
| PC2        | 3.5×10 <sup>5</sup>  | 17.76          | 68.86          | 9.2×10 <sup>5</sup>  | 12.40          | 67.85          |
| PC3        | 2.3×10 <sup>5</sup>  | 11.66          | 80.52          | 8.1×10 <sup>5</sup>  | 11.03          | 78.87          |
| PC4        | 1.2×10 <sup>5</sup>  | 5.86           | 86.38          | 4.2×10 <sup>5</sup>  | 5.70           | 84.57          |
| PC5        | 0.8×10 <sup>5</sup>  | 3.85           | 90.22          | 2.5×10 <sup>5</sup>  | 3.40           | 87.98          |



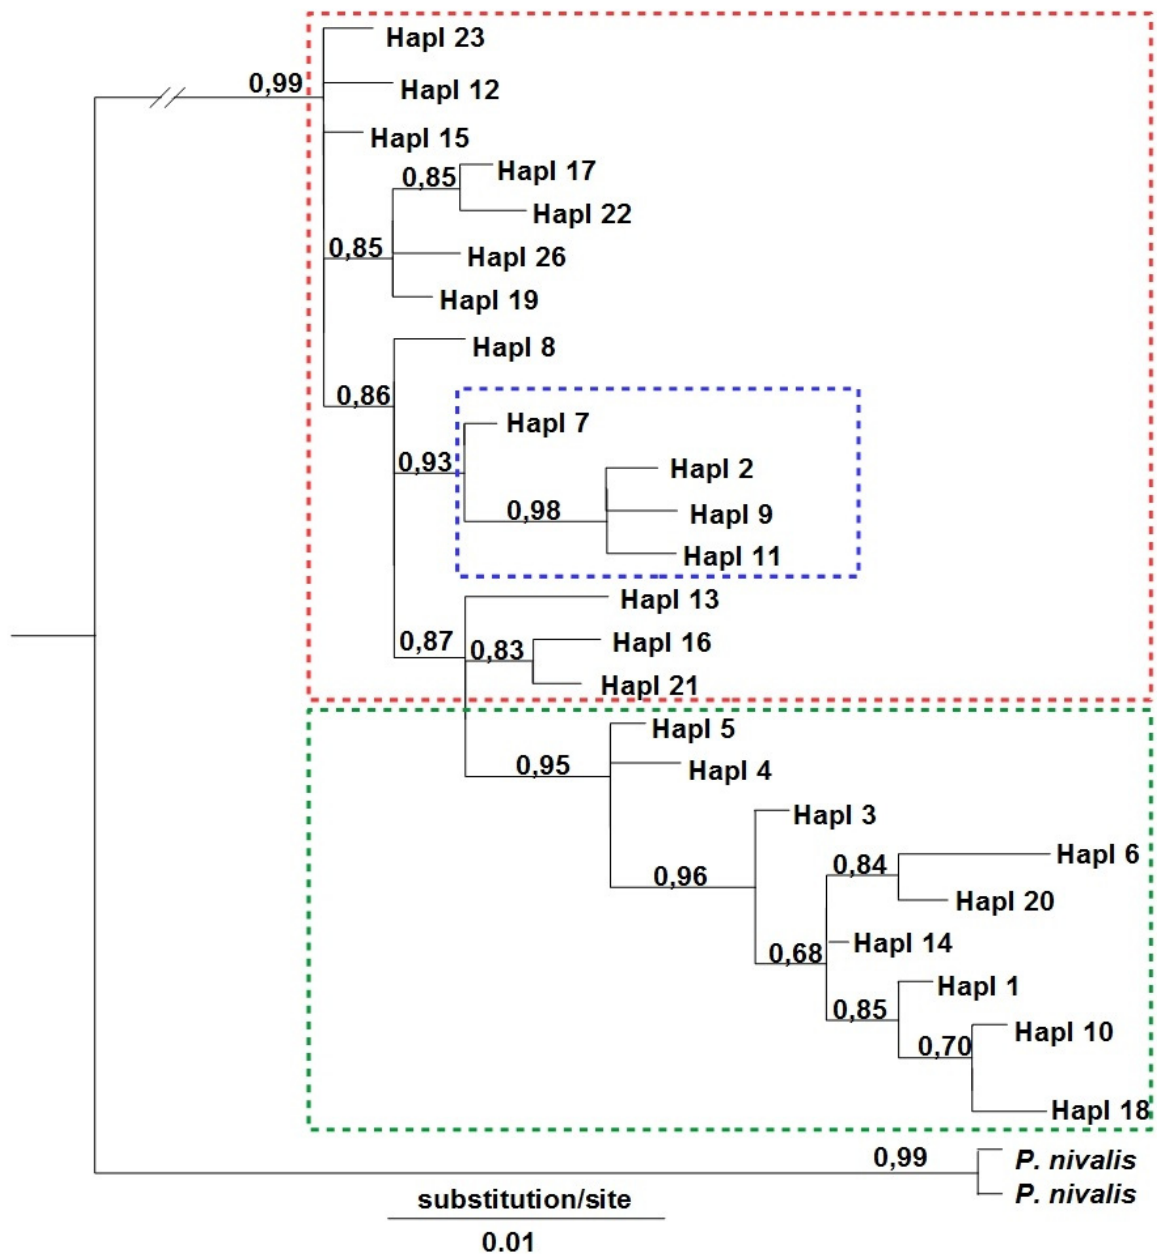

**Figure S1.** Phylogenetic tree of *Pterostichus brevicornis brevicornis* recovered from Bayesian inference analysis based on the COI sequence dataset. Haplotype codes are indicated in Table S1. The dashed rectangles corresponded to subclades of the majority-rule consensus phylogenetic tree (see Figure 2). Numbers near branches indicate the Bayesian posterior probability (BPP).
